# Supplementary material
Source: Springer Nature journal article supplement (https://www.springermedizin.de/resource/supplementary/13075_2009_2773_MOESM1_ESM.pdf/9692856)
Supplement: MOESM1 [file 9692856]

## MeSH Headings:

1. exp Bone Density Conservation Agents
2. exp Osteoporosis OR exp Osteoporosis, Postmenopausal
3. exp Alendronate
4. exp Etidronic Acid
5. exp Diphosphonates
6. exp Atrial Fibrillation
7. exp Atrial Flutter
8. exp Arrhythmias, Cardiac

17. 1 OR 2 OR 3 OR 4 OR 5
18. 9 OR 10 OR 11 OR 12 OR 13
19. 17 OR 18
20. 6 OR 7 OR 8
21. 14 OR 15 OR 16
22. 20 OR 21
23. 19 AND 22

## Keywords:

9. Alendronate
10. Fosamax
11. Risedronate OR Actonel
12. Ibandronate OR Boniva
13. Zoledronate OR Zoledronic acid OR Reclast
14. Atrial fibrillation
15. Atrial flutter
16. Arrhythmia
